# Supplementary material
Source: HighWire-hosted journal article supplement (https://mentalhealth.bmj.com/content/22/4/153)
Supplement: inline-supplementary-material-1 [file inline-supplementary-material-1.txt]

author	year	resp.h	fail.h	drop.h	resp.p	fail.p	drop.p
Arvanitis	1997	25	25	2	18	33	0
Beasley	1996	29	18	22	20	14	34
Bechelli	1983	12	17	1	2	28	1
Borison	1992	3	9	0	0	12	0
Chouinard	1993	10	11	0	3	19	0
Durost	1964	11	8	0	1	14	0
Garry	1962	7	18	1	4	21	1
Howard	1974	8	9	0	3	10	0
Marder	1994	19	45	2	14	50	2
Nishikawa	1982	1	9	0	0	10	0
Nishikawa	1984	11	23	3	0	13	0
Reschke	1974	20	9	0	2	9	0
Selman	1976	17	1	11	7	4	18
Serafetinides	1972	4	10	0	0	13	1
Simpson	1967	2	14	0	0	7	1
Spencer	1992	11	1	0	1	11	0
Vichaiya	1971	9	20	1	0	29	1
